# Supplementary material for: Design of 3D 1,3,5,7-tetraphenyladamantane-based covalent organic frameworks as hydrogen storage materials
Source: Royal Society of Chemistry journal article supplement (doi:10.1039/c4ra02988g), 2014-01-01
Supplement: c4ra02988g1.pdf [file c4ra02988g1.pdf]

## ***Supporting Information***

### Design of 3D 1,3,5,7-tetraphenyladamantane based covalent organic frameworks as hydrogen storage materials

Xiao-Dong Li,<sup>\*1</sup> Jing-Hua Guo,<sup>2</sup> Hong Zhang,<sup>3</sup> Xin-Lu Cheng,<sup>4</sup> Xiu-Ying Liu<sup>1</sup>

<sup>1</sup>*College of Science, Henan University of Technology, Zhengzhou 450001, China*

<sup>2</sup>*School of Physics Science, University of Jinan, Jinan 250022, China*

<sup>3</sup>*College of Physical Science and Technology, Sichuan University, Chengdu 610065, China*

<sup>4</sup>*The Institute of Atomic and Molecular Physics, Sichuan University, Chengdu 610065, China*

The supporting information provides the space group symmetries and coordinates of four designed adm-ACOF frameworks.

---

\* Corresponding author: Xiao-Dong Li, E-mail: dragoninstream@gmail.com



Name  
adm-ACOF-1

Space group symmetry

I-43m

a = b = c = 33.1972

alpha = beta = gamma = 90°

| Atom | x       | y       | z       |
|------|---------|---------|---------|
| C1   | 0.45404 | 0.27800 | 0.62482 |
| C2   | 0.46159 | 0.24097 | 0.65326 |
| B3   | 0.42746 | 0.48854 | 0.46721 |
| O4   | 0.43399 | 0.45503 | 0.49422 |
| C5   | 0.51435 | 0.33711 | 0.54165 |
| C6   | 0.50905 | 0.37002 | 0.51550 |
| C7   | 0.48417 | 0.32487 | 0.56949 |
| C8   | 0.47322 | 0.39277 | 0.51638 |
| C9   | 0.44305 | 0.38172 | 0.54413 |
| C10  | 0.44840 | 0.34846 | 0.56983 |
| H11  | 0.44725 | 0.30446 | 0.64319 |
| H12  | 0.42741 | 0.27185 | 0.60633 |
| H13  | 0.54109 | 0.32201 | 0.53983 |
| H14  | 0.53175 | 0.37720 | 0.49592 |
| H15  | 0.41665 | 0.39758 | 0.54576 |
| H16  | 0.42513 | 0.34205 | 0.58880 |
| H17  | 0.52591 | 0.25497 | 0.55085 |
| C18  | 0.50000 | 0.25000 | 0.57056 |

Name  
adm-ACOF-2

Space group symmetry

P-43m

a = b = c = 21.581

alpha = beta = gamma = 90°

| Atom | x       | y       | z       |
|------|---------|---------|---------|
| H1   | 0.88782 | 0.47393 | 0.96875 |
| C2   | 0.13844 | 0.61429 | 0.05959 |
| C3   | 0.17088 | 0.66084 | 0.09170 |
| H4   | 0.15768 | 0.59998 | 0.01902 |
| H5   | 0.21151 | 0.67703 | 0.07337 |
| C6   | 0.95752 | 0.54452 | 0.95752 |
| C7   | 0.08116 | 0.58972 | 0.08116 |
| C8   | 0.14711 | 0.68584 | 0.14711 |
| C9   | 0.91780 | 0.50000 | 0.00000 |
| C10  | 0.00000 | 0.58487 | 0.00000 |
| H11  | 0.02888 | 0.61509 | 0.97112 |
| C12  | 0.73946 | 0.82211 | 0.82211 |
| C13  | 0.76732 | 0.76732 | 0.84872 |

Name

adm-ACOF-3

Space group symmetry

I-43m

a = b = c = 49.2532

alpha = beta = gamma = 90°

| Atom | x       | y       | z       |
|------|---------|---------|---------|
| B1   | 0.36960 | 0.53342 | 0.47722 |
| O2   | 0.38754 | 0.53358 | 0.45408 |
| C3   | 0.58735 | 0.46443 | 0.31568 |
| C4   | 0.56912 | 0.50939 | 0.30902 |
| C5   | 0.55162 | 0.50574 | 0.33129 |
| C6   | 0.55194 | 0.48129 | 0.34609 |
| C7   | 0.57007 | 0.46068 | 0.33812 |
| H8   | 0.59981 | 0.44860 | 0.31095 |
| H9   | 0.57082 | 0.44268 | 0.34848 |
| H10  | 0.56809 | 0.52758 | 0.29913 |
| H11  | 0.53871 | 0.52115 | 0.33658 |
| O12  | 0.37810 | 0.51233 | 0.49566 |
| C13  | 0.43745 | 0.46881 | 0.47621 |
| C14  | 0.44490 | 0.48360 | 0.45215 |
| C15  | 0.39978 | 0.50079 | 0.48348 |
| C16  | 0.40554 | 0.51353 | 0.45910 |
| C17  | 0.42767 | 0.50527 | 0.44342 |
| C18  | 0.41541 | 0.47880 | 0.49225 |
| H19  | 0.43045 | 0.51552 | 0.42571 |
| H20  | 0.41005 | 0.47066 | 0.51045 |
| C21  | 0.58752 | 0.48889 | 0.30031 |
| C22  | 0.49368 | 0.27581 | 0.60592 |
| C23  | 0.46884 | 0.26853 | 0.62482 |
| H24  | 0.21403 | 0.61291 | 0.46362 |
| H25  | 0.20096 | 0.63765 | 0.48588 |
| H26  | 0.49644 | 0.26742 | 0.67502 |
| C27  | 0.50000 | 0.25000 | 0.66174 |

Name  
adm-ACOF-4

Space group symmetry

P-43m

a = b = c = 32.1251

alpha = beta = gamma = 90°

| Atom | x       | y       | z       |
|------|---------|---------|---------|
| O1   | 0.32419 | 0.16077 | 0.89088 |
| C2   | 0.16964 | 0.20135 | 0.76713 |
| C3   | 0.16784 | 0.29392 | 0.86258 |
| C4   | 0.19974 | 0.26445 | 0.86178 |
| H5   | 0.22081 | 0.26707 | 0.88517 |
| H6   | 0.14356 | 0.61694 | 0.05081 |
| H7   | 0.10596 | 0.56711 | 0.01279 |
| C8   | 0.11601 | 0.60629 | 0.06277 |
| C9   | 0.09338 | 0.57621 | 0.04039 |
| H10  | 0.92468 | 0.48248 | 0.97901 |
| C11  | 0.10058 | 0.62212 | 0.10058 |
| C12  | 0.05468 | 0.56002 | 0.05468 |
| C13  | 0.97148 | 0.52995 | 0.97148 |
| B14  | 0.34392 | 0.12285 | 0.87715 |
| C15  | 0.94483 | 0.50000 | 0.00000 |
| C16  | 0.00000 | 0.55710 | 0.00000 |
| H17  | 0.98060 | 0.57739 | 0.01940 |
